# Supplementary material
Source: PubMed Central journal article supplement (PMC6745503)
Supplement: EMBJ-38-e100811-s002.pdf [file EMBJ-38-e100811-s002.pdf]

## Expanded View Figures

**Figure EV1. Bipolar marker gene expression in the compiled human neural retina transcriptome atlas (20,009 cells).**

- A Feature expression heatmap of VSX2 (pan-bipolar), ISL1 (ON-bipolar), GRIK1 (OFF-bipolar), PRKCA (rod bipolar cells), and TTR (DB4 bipolar).
- B t-SNE plots showing gene expression for 14 new markers for individual bipolar subtypes identified in a previous mouse scRNA-seq study (Shekhar *et al*, 2016).

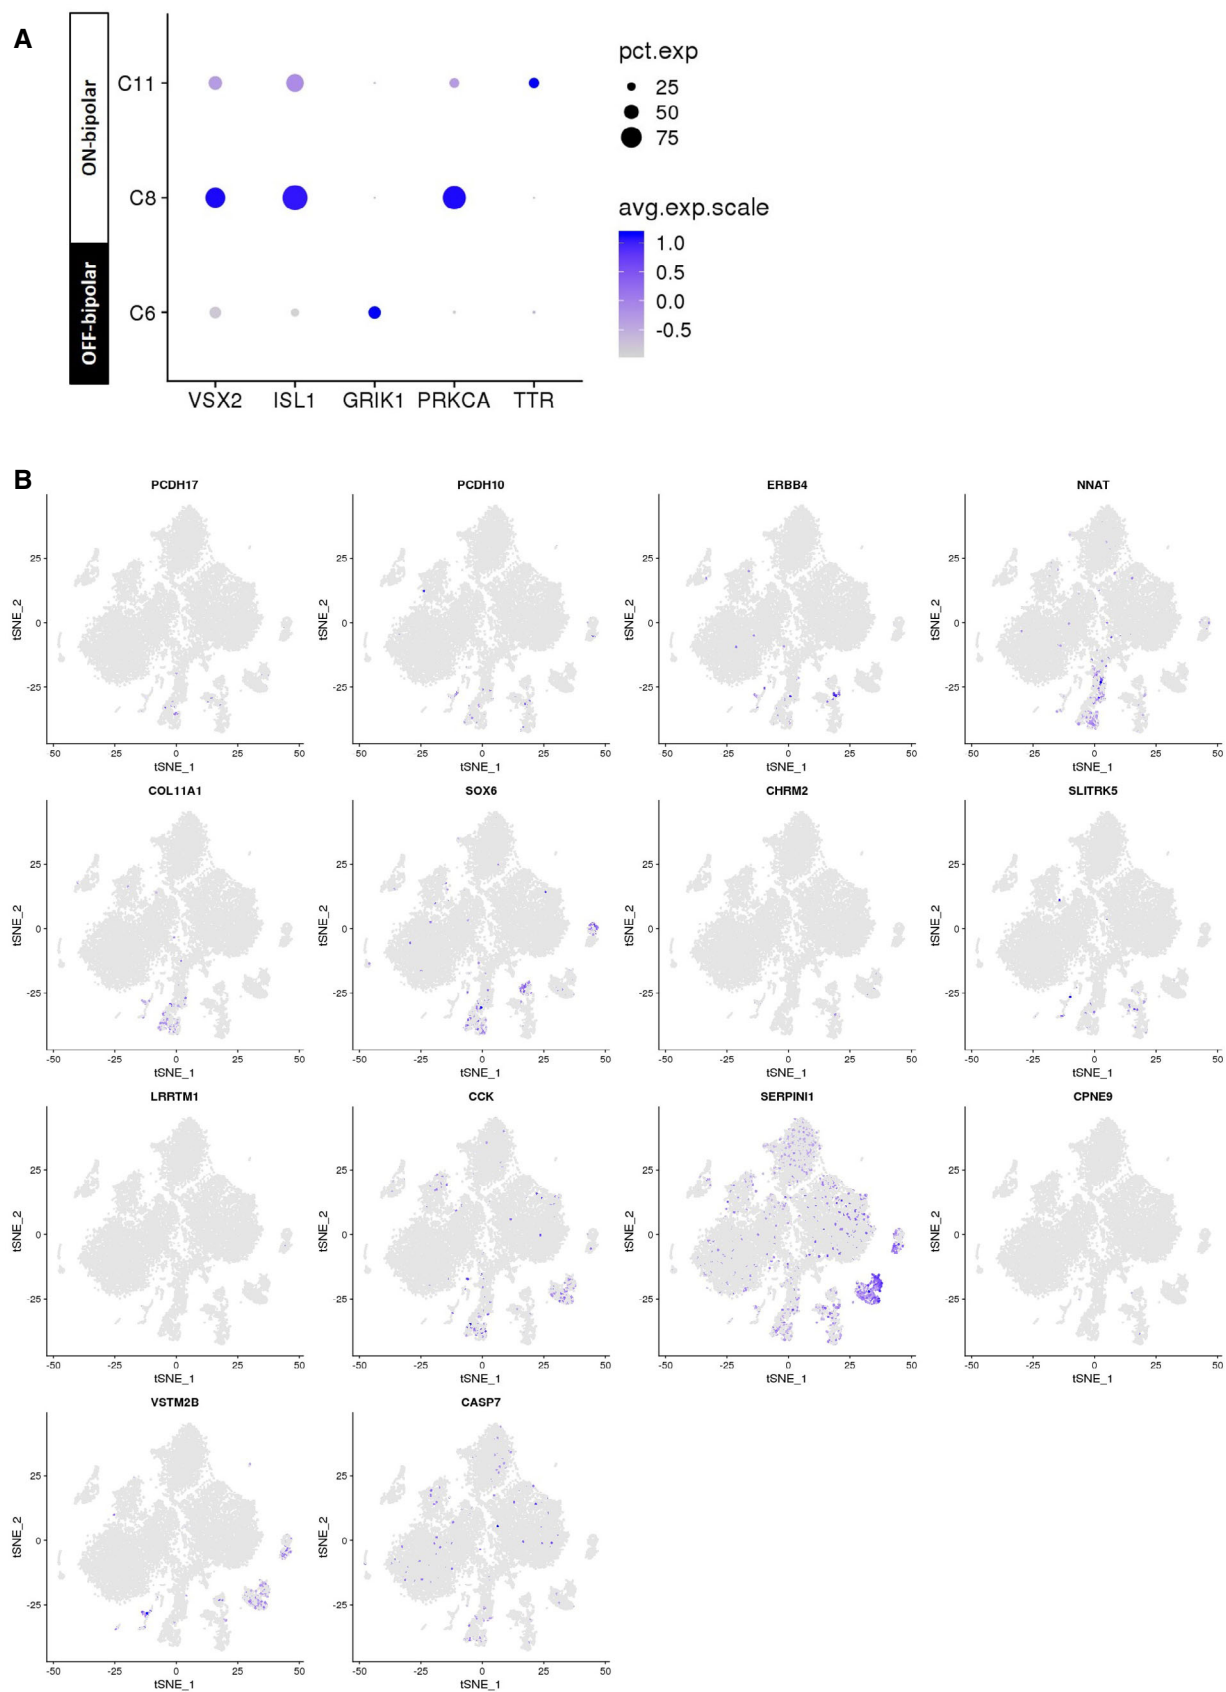

Figure EV1.

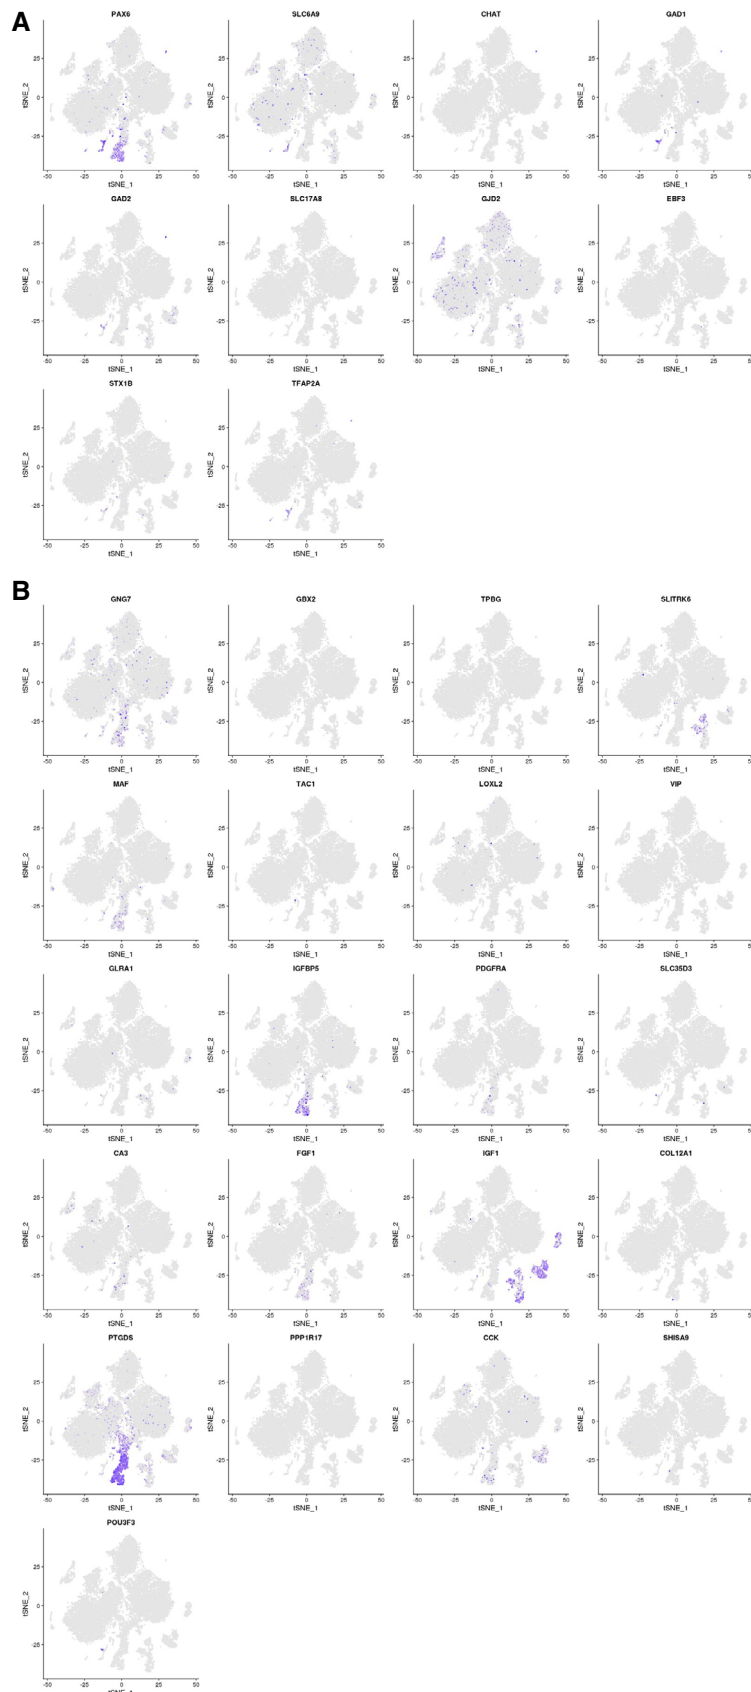

**Figure EV2. Amacrine marker gene expression in the compiled human neural retina transcriptome atlas (20,009 cells).**

A, B t-SNE plots showing gene expression in the compiled human retina transcriptome atlas (20,009 cells). (A) 10 commonly used amacrine markers and (B) new markers for amacrine subtypes identified in a previous mouse scRNA-seq study (Macosko et al, 2015).

**Figure EV3. MALAT1 expression in human retina.**

- A Fluorescent *in situ* hybridization showing expression of *MALAT1* in three donor retina samples (Retina 4–6). Retina 5 from Fig 2E is also displayed here for easier comparison. Green arrows highlight rod photoreceptors with low levels of *MALAT1* in Retina 4 and Retina 6, and white arrows highlight rod photoreceptors with high levels of *MALAT1* in Retina 5. Scale bars = 20  $\mu\text{m}$ .
- B Correlation of proportion of MALAT1-hi rod populations with time of retina retrieval after death for Retina 1–3.

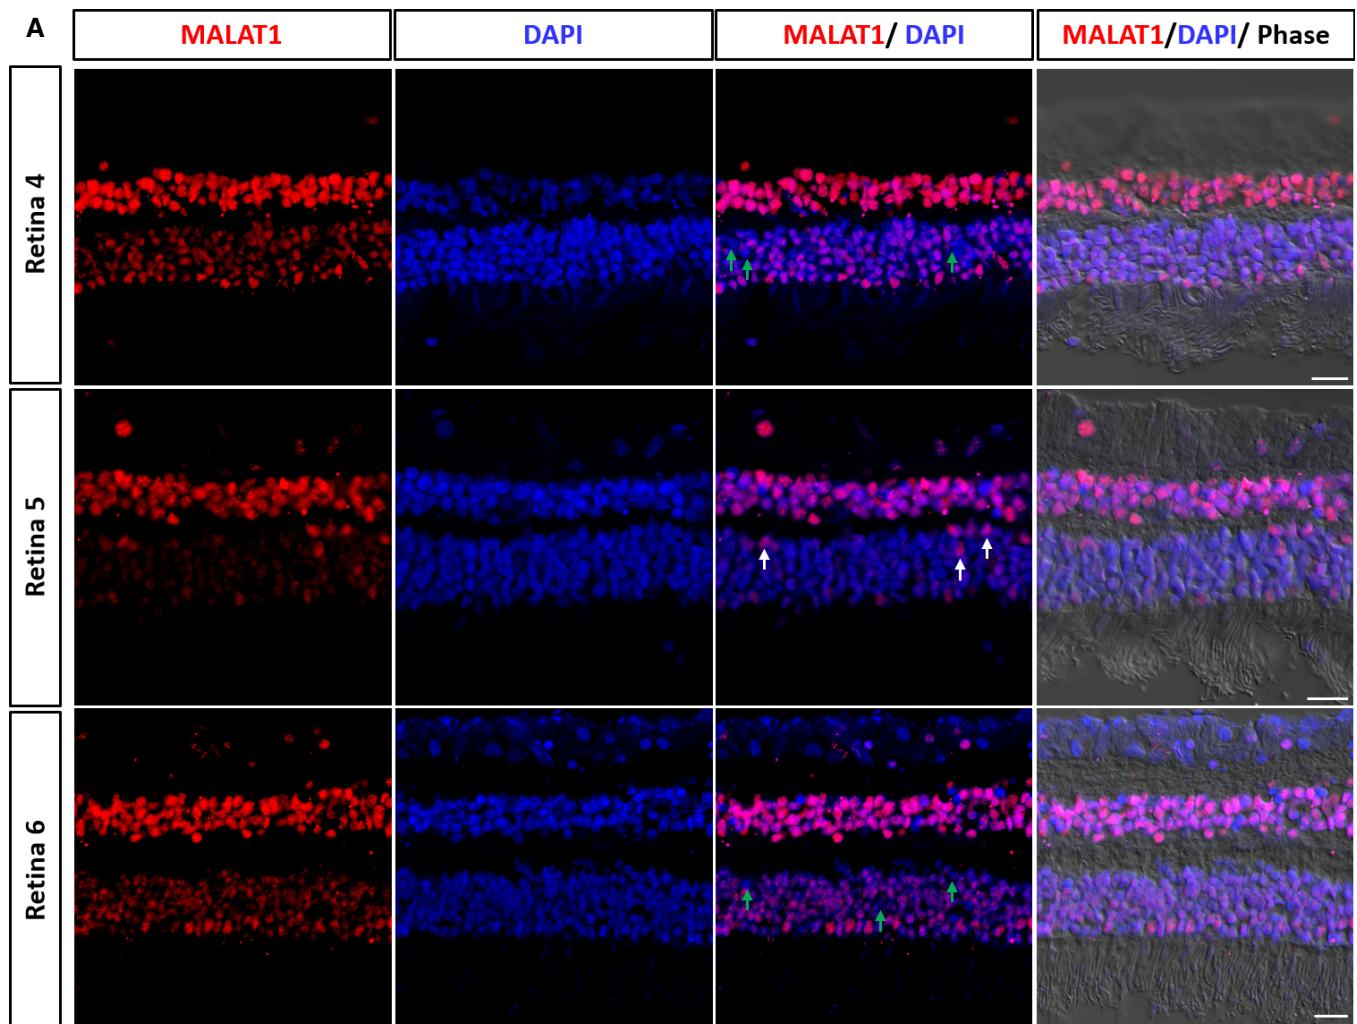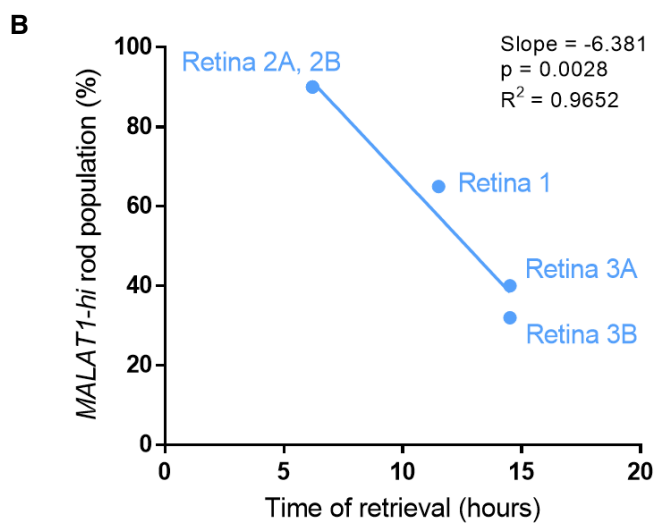

Figure EV3.

**Figure EV4. Cell cycle scores for major retinal cell types.**  
 Cell cycle scores across major retinal cell clusters showing the likelihood for the proportion of cells in G1, S, or G2/M phases.

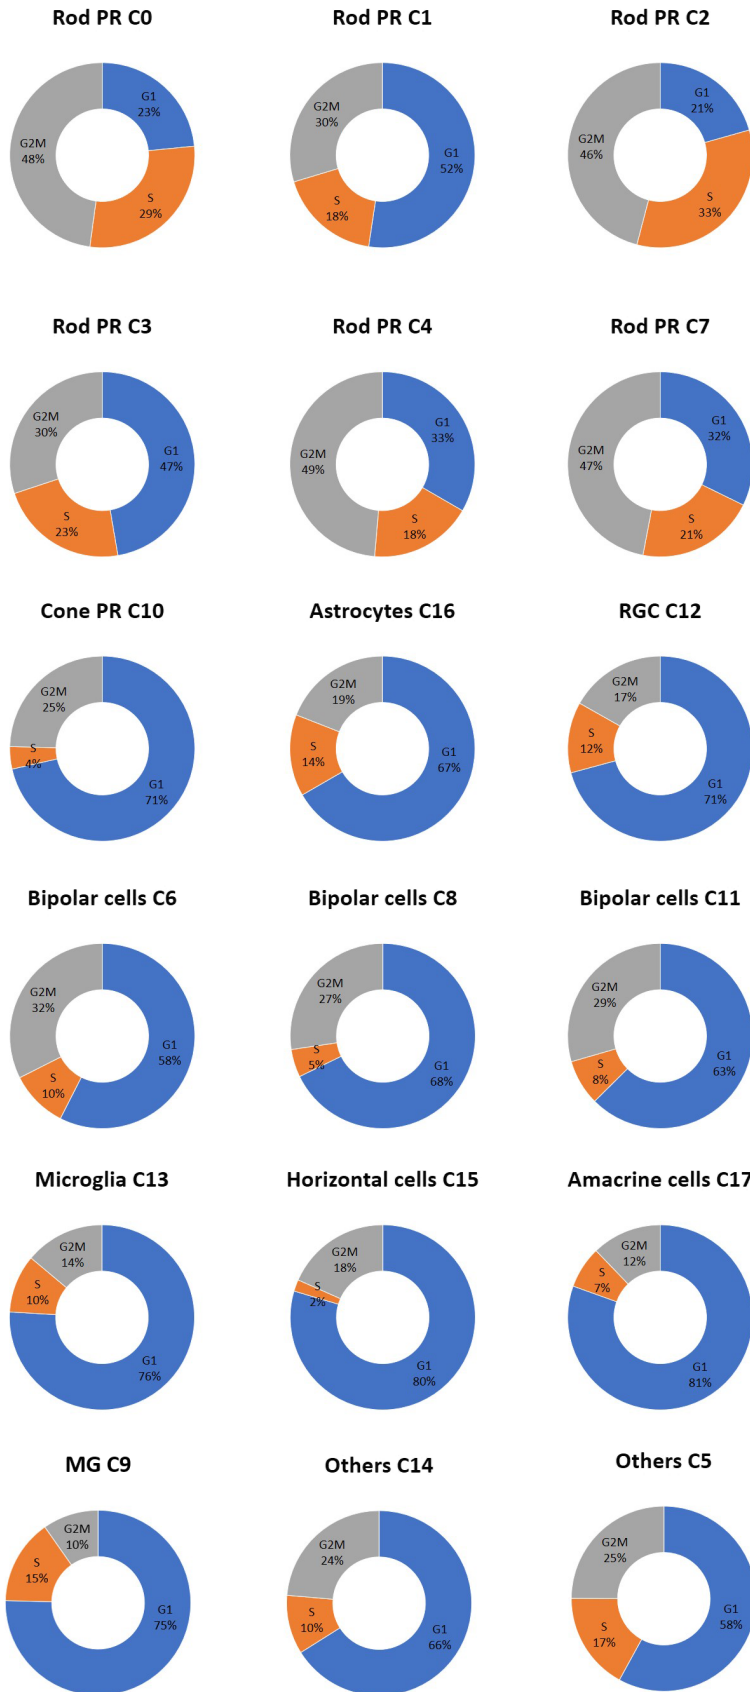



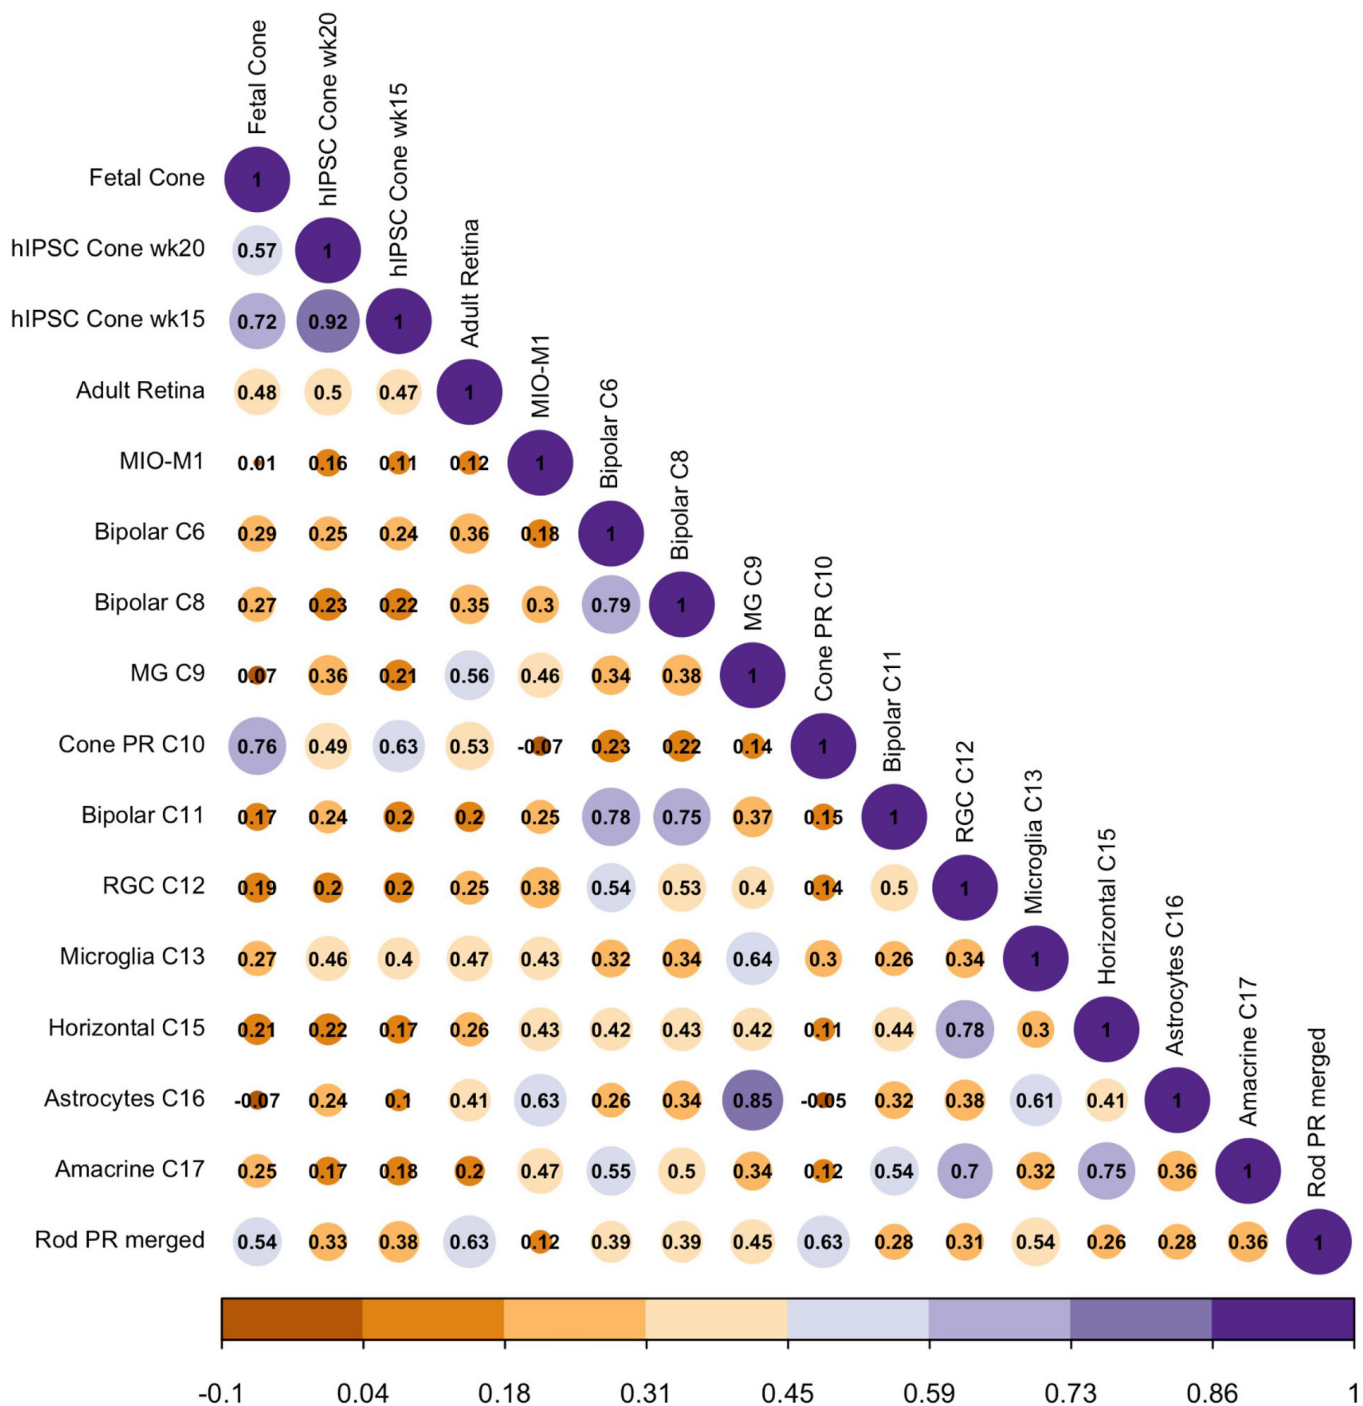

**Figure EV5. Using the human neural retina transcriptome atlas as a benchmark.**

Correlation matrix to benchmark hiPSC-derived cone photoreceptors (week 15 and week 20; Welby *et al*, 2017), fetal cone photoreceptors (Welby *et al*, 2017), adult retina (Phillips *et al*, 2018), and the human Müller glia cell line MIO-M1 against all retinal cell types identified in this human neural retina atlas.
